# Supplementary material for: Separate Polycomb Response Elements control chromatin state and activation of the vestigial gene
Source: PubMed Central journal article supplement (PMC6730940; doi:10.1371/journal.pgen.1007877), 2019-08-19

# Supplementary Figure 1

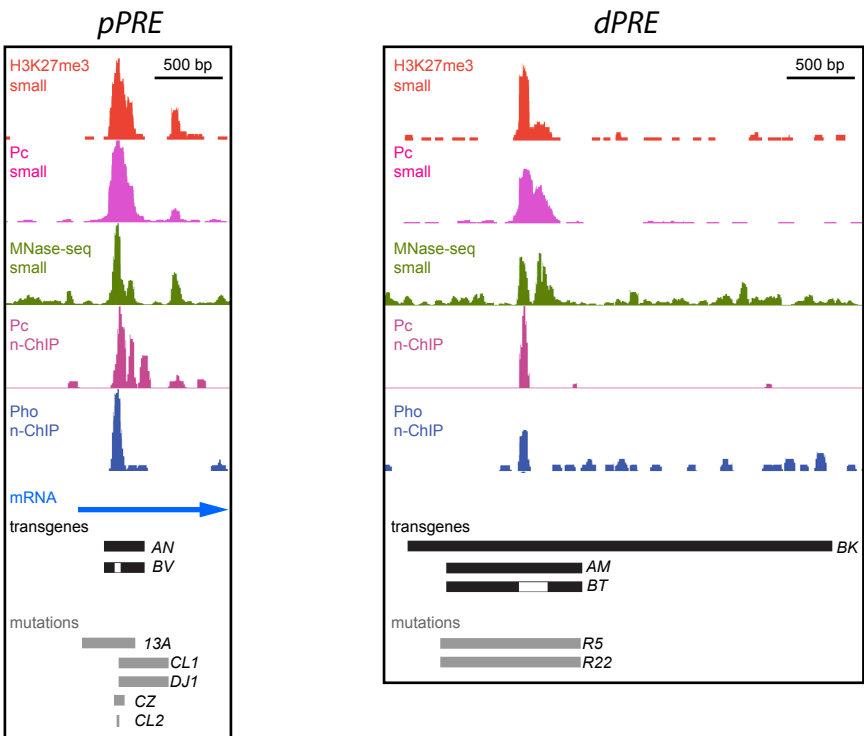

Supplement: pgen.1007877.s001.pdf [file pgen.1007877.s001.pdf]
